# Supplementary material
Source: publisher figshare collection journal article supplement (https://sage.figshare.com/ndownloader/files/18209339)

Supplementary file 2: Graphs of mean change of outcomes from baseline to Week 20 for each treatment arm and diet quality scores according to median split

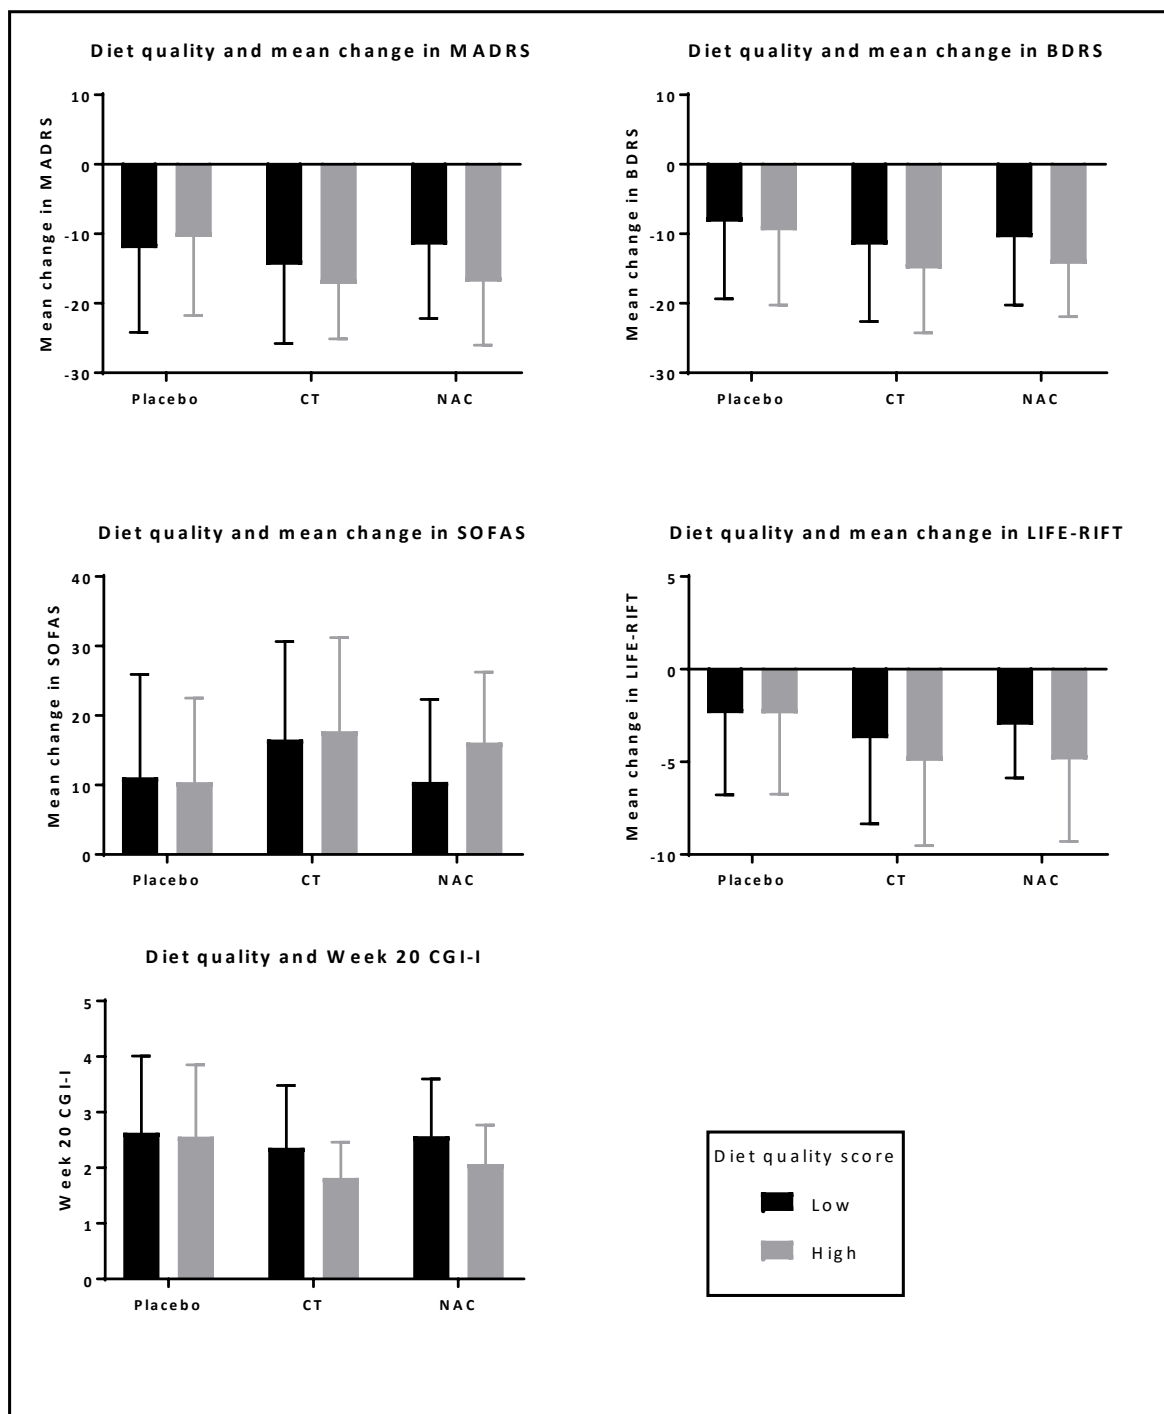

Supplementary file 3: Graphs of mean change of outcomes from baseline to Week 20 for each treatment arm and dietary inflammatory index scores

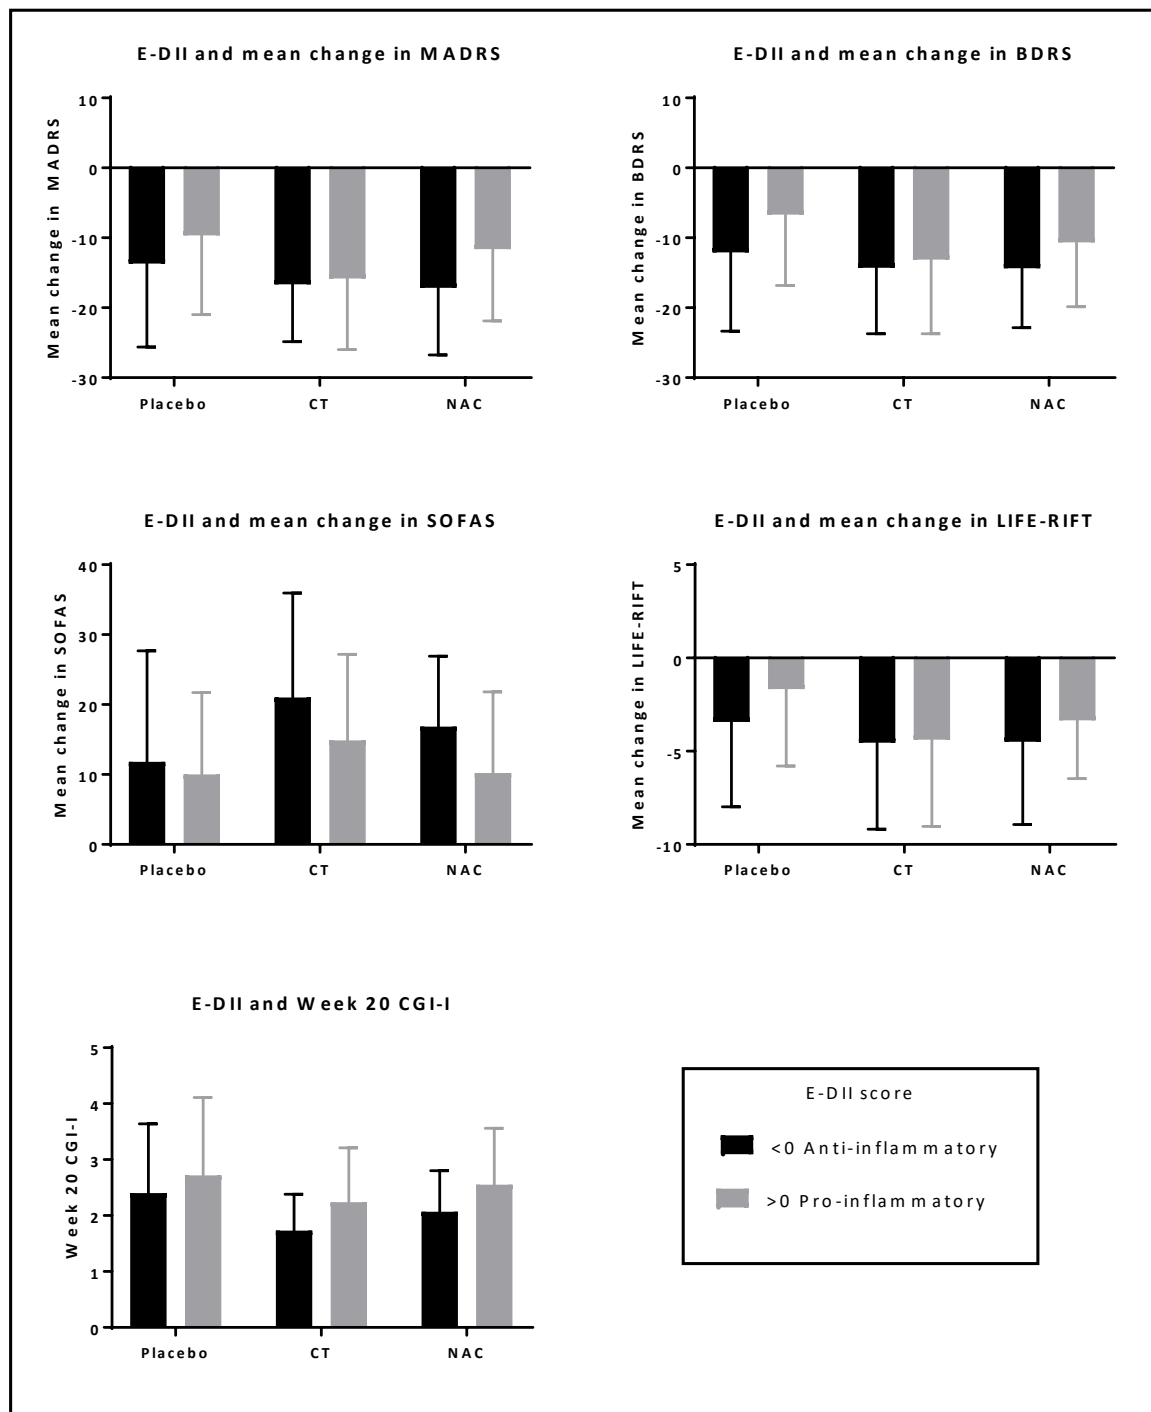

Supplementary file 4: Graphs of mean change of outcomes from baseline to Week 20 for each treatment arm and BMI scores according to median split

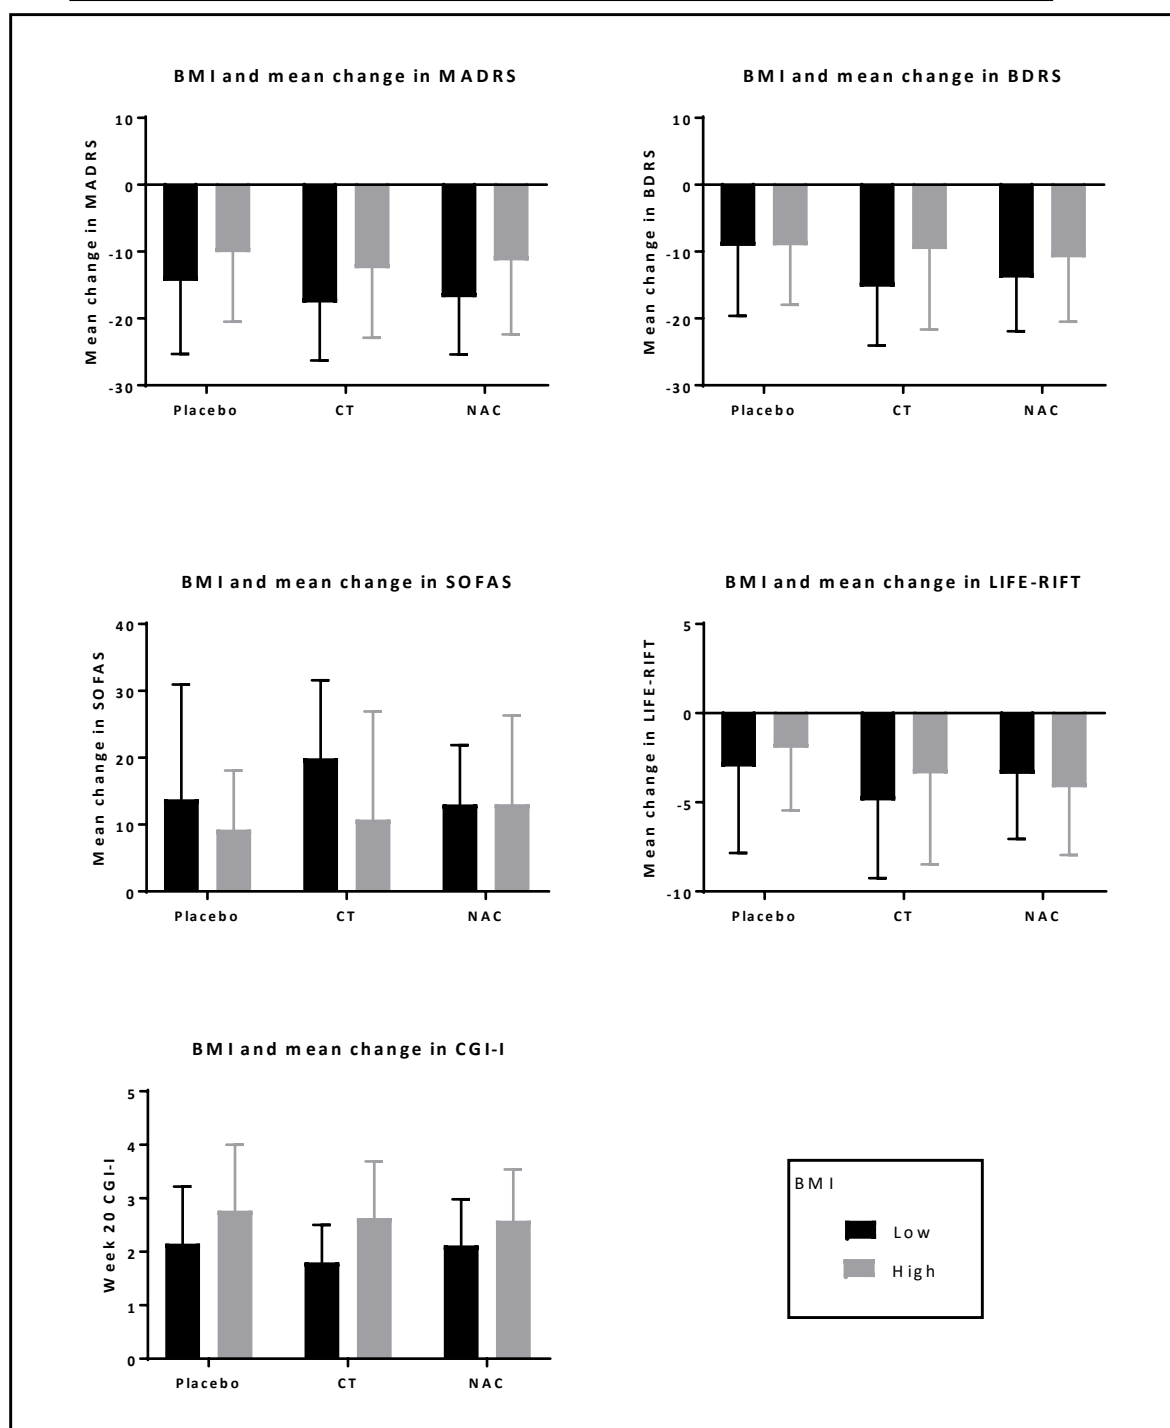

Supplement: Supplementary file 1 [file 18209339]
